# Supplementary material for: Growth of nanostructured Cu3Al alloy films by magnetron sputtering for non-enzymatic glucose-sensing applications
Source: Royal Society of Chemistry journal article supplement (doi:10.1039/d3ra02076b), 2023-01-01
Supplement: d3ra02076b1.pdf [file d3ra02076b1.pdf]

## Supplementary information

### **Growth of Nanostructured Cu<sub>3</sub>Al Alloy Films by Magnetron Sputtering for Non-Enzymatic Glucose-Sensing Applications**

Yuqing Yin,<sup>a</sup> Ting Zhang,<sup>a</sup> Lemeng Feng,<sup>b</sup> Junhui Ran,<sup>a</sup> Chao Ma,<sup>a</sup> Yongwen Tan,<sup>a</sup>  
Weitao Song<sup>\*b</sup> and Bin Yang<sup>\*a</sup>

<sup>a</sup> *College of Materials Science and Engineering, Hunan University, Changsha, 410082,  
China*

<sup>b</sup> *Xiangya Hospital of Central South University, Changsha, 410008, China*

**Corresponding author:** Bin Yang (yangb1@hnu.edu.cn), Weitao Song  
(wtsong1980@csu.edu.cn)

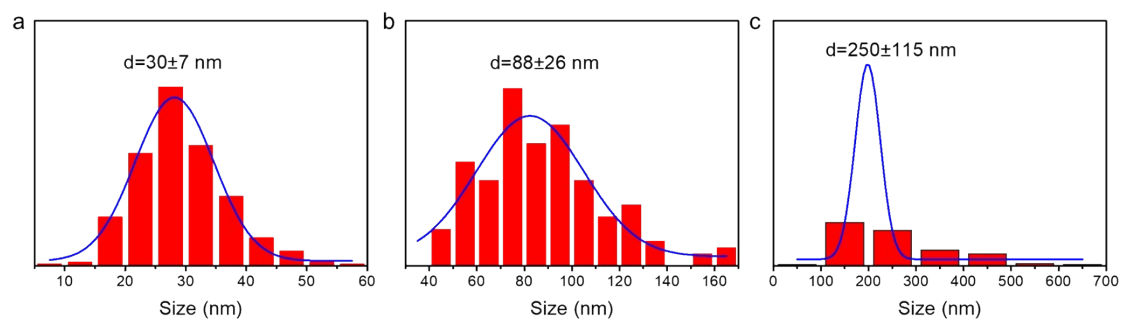

**Figure S1.** The statistical distribution of particle size of (a) Cu, (b) Al and (c) Cu-Al thin films obtained from the SEM image analysis.

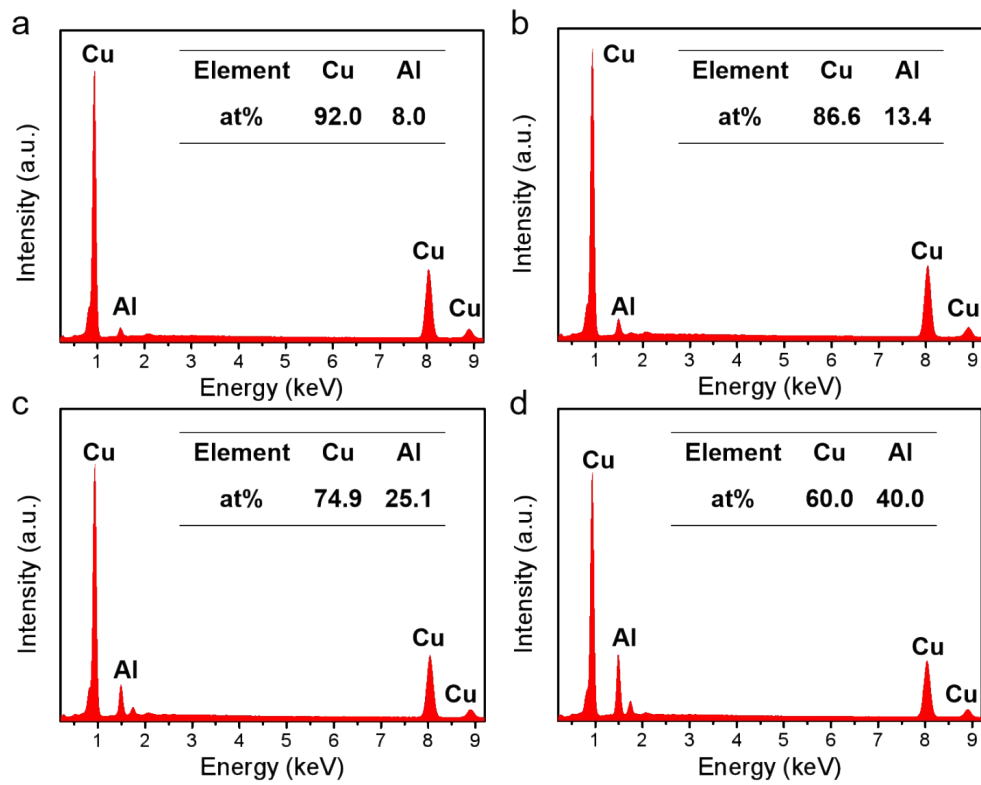

**Figure S2.** EDS spectra for the Cu-Al films under different process parameters.

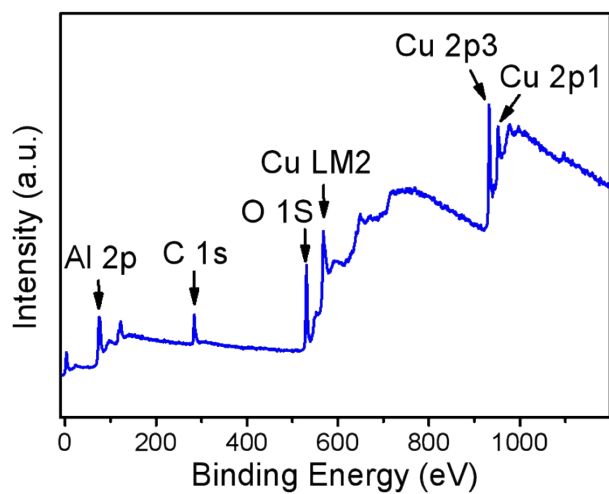

**Figure S3.** XPS spectra of Al 25% sample: full wide-scan.

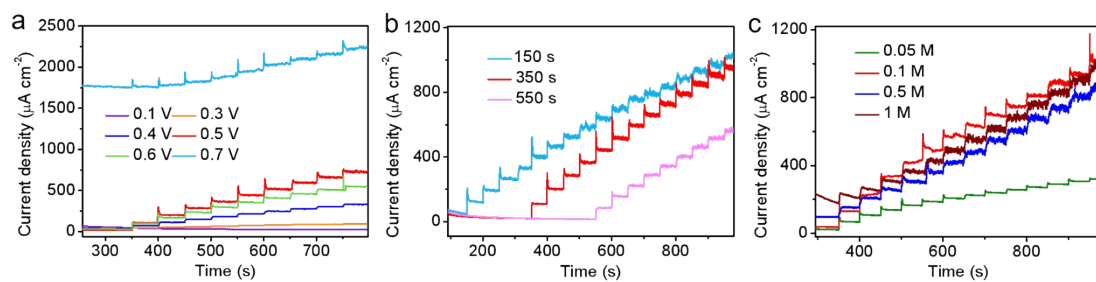

**Figure S4.** Amperometric response of Cu<sub>3</sub>Al alloy to stepwise addition of 50 μM glucose in the NaOH solution with changing (a) applied-bias, (b) etching time, (c) NaOH concentration.

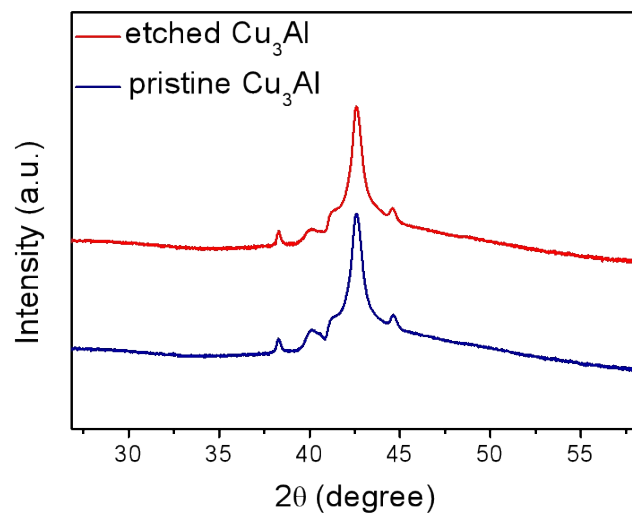

**Figure S5.** XRD pattern of  $\text{Cu}_3\text{Al}$  before and after etching in 0.1 M NaOH for 350 s.

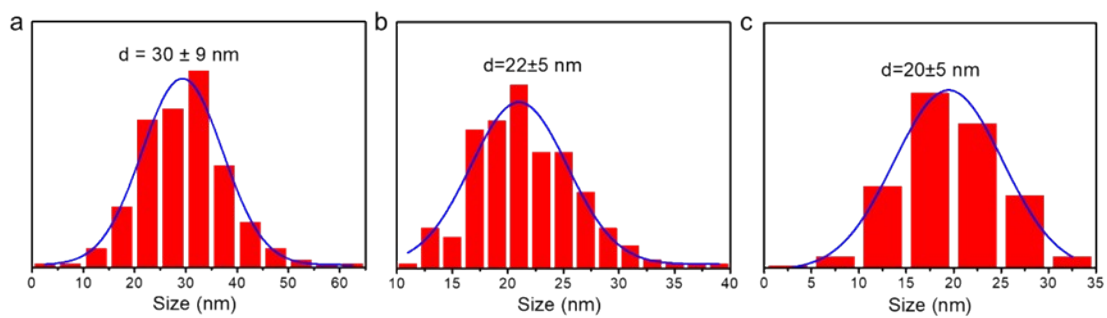

**Figure S6.** The statistical distribution of particle size of Cu<sub>3</sub>Al alloy films after etching in 0.1 M NaOH solution for 150 s (a), 350 s (b) and 550 s (c) obtained from the SEM images.

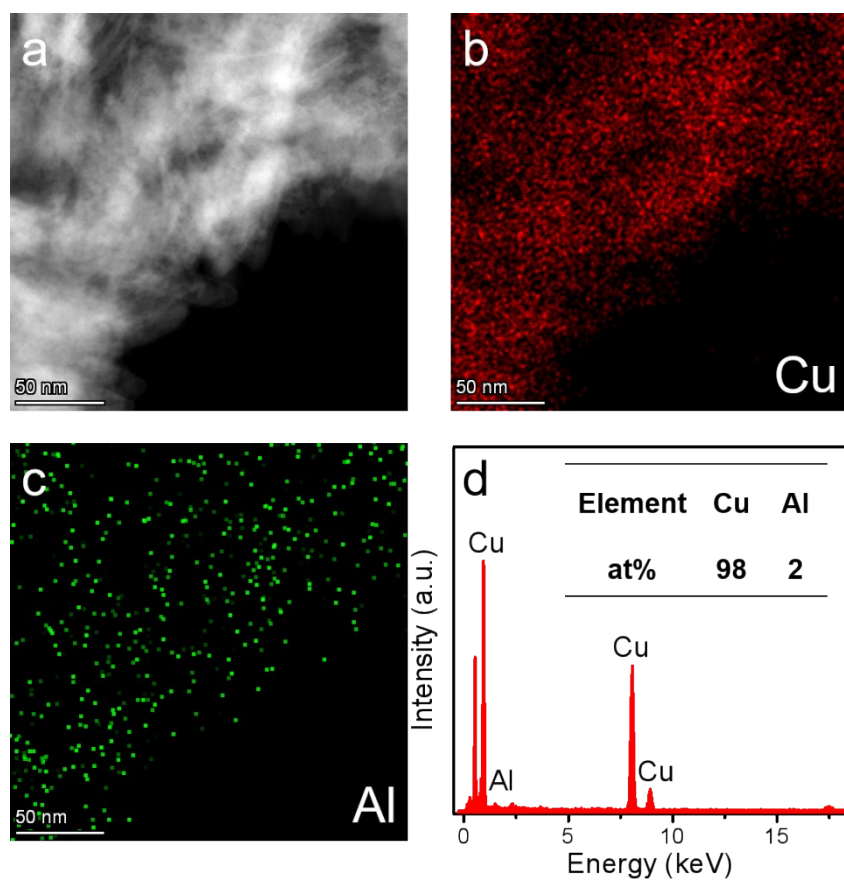

**Figure S7.** (a) TEM image, elemental mapping images of (b) Cu and (c) Al, and (d) EDS of  $\text{Cu}_3\text{Al}$  after etching in 1 M NaOH for 350 s.



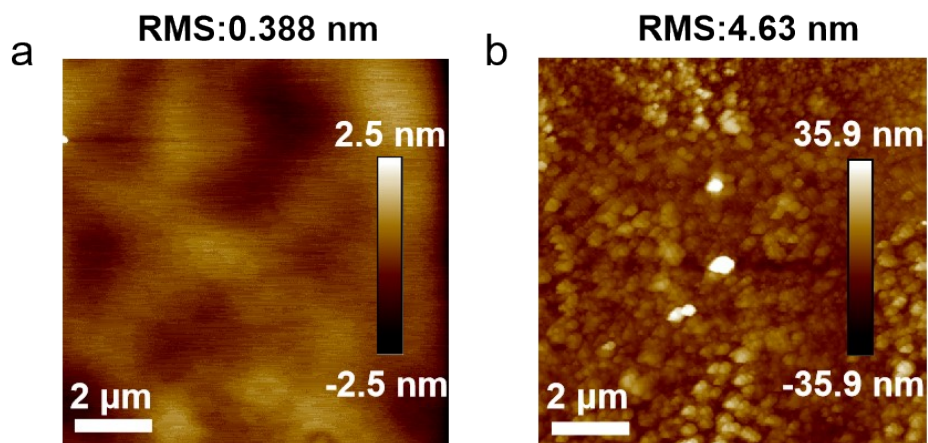

**Figure S8.** AFM images of Cu<sub>3</sub>Al (a) before and (b) after etching in 0.1 M NaOH for 350 s.
